# Supplementary material for: State of Public Health at the Local Level in Serbia: Longitudinal Research
Source: Preprints.org preprint supplement (doi:10.20944/preprints202301.0166.v1), 2023-01-10
Supplement: Supplementary file 1 [file supplementary]

Supplementary material

State of Public Health at the Local Level in Serbia:
Longitudinal Research

| **Citation:** Cvetković, V.M.; Tanasić, J.; Živković-Šulović, M.; Ćurić, N.; Milojević, S. State of Public Health at the Local Level in Serbia: Longitudinal Research. *Int. J.  Environ. Res. Public Health* **2023**, *20*, x. https://doi.org/10.3390/xxxxx  Academic Editor(s):  Received: date  Revised: date  Accepted: date  Published: date  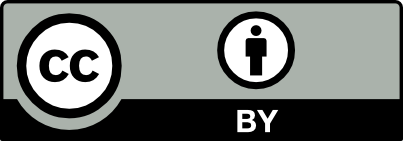  **Copyright:** © 2023 by the authors. Submitted for possible open access publication under the terms and conditions of the Creative Commons Attribution (CC BY) license (https://creativecommons.org/licenses/by/4.0/). |
| --- |

Vladimir M. Cvetković 1,2,3,*, Jasmina Tanasić 4, Mirjana Živković-Šulović 5, Nedeljko Ćurić 4 and Stefan Milojević 6

1 Faculty of Security Studies, University of Belgrade, Gospodara Vučića 50, 11040 Belgrade, Serbia

2 Scientific-Professional Society for Disaster Risk Management, Dimitrija Tucovića 121, 11040 Belgrade, Serbia

3 International Institute for Disaster Research, Dmitrija Tucovića 121, 11040 Belgrade, Serbia

4 Standing Conference of Towns and Municipalities, Makedonska 22/VIII ,11103 Belgrade, Serbia;
[jasmina.tanasic@skgo.org](mailto:jasmina.tanasic@skgo.org) (J.T.); nedeljko.curic@skgo.org (N.Ć.)

5 Institute of Public Health of Serbia, Dr Milan Jovanović Batut, Dr Subotica 5, 11000 Belgrade, Serbia;
mirjanasulovic@gmail.com

6 Faculty of Finance, Banking and Audit,, Palmira Toljatija 3, 11070 Belgrade, Serbia;
aviation.adviser@gmail.com

***** Correspondence: vmc@fb.bg.ac.rs

**
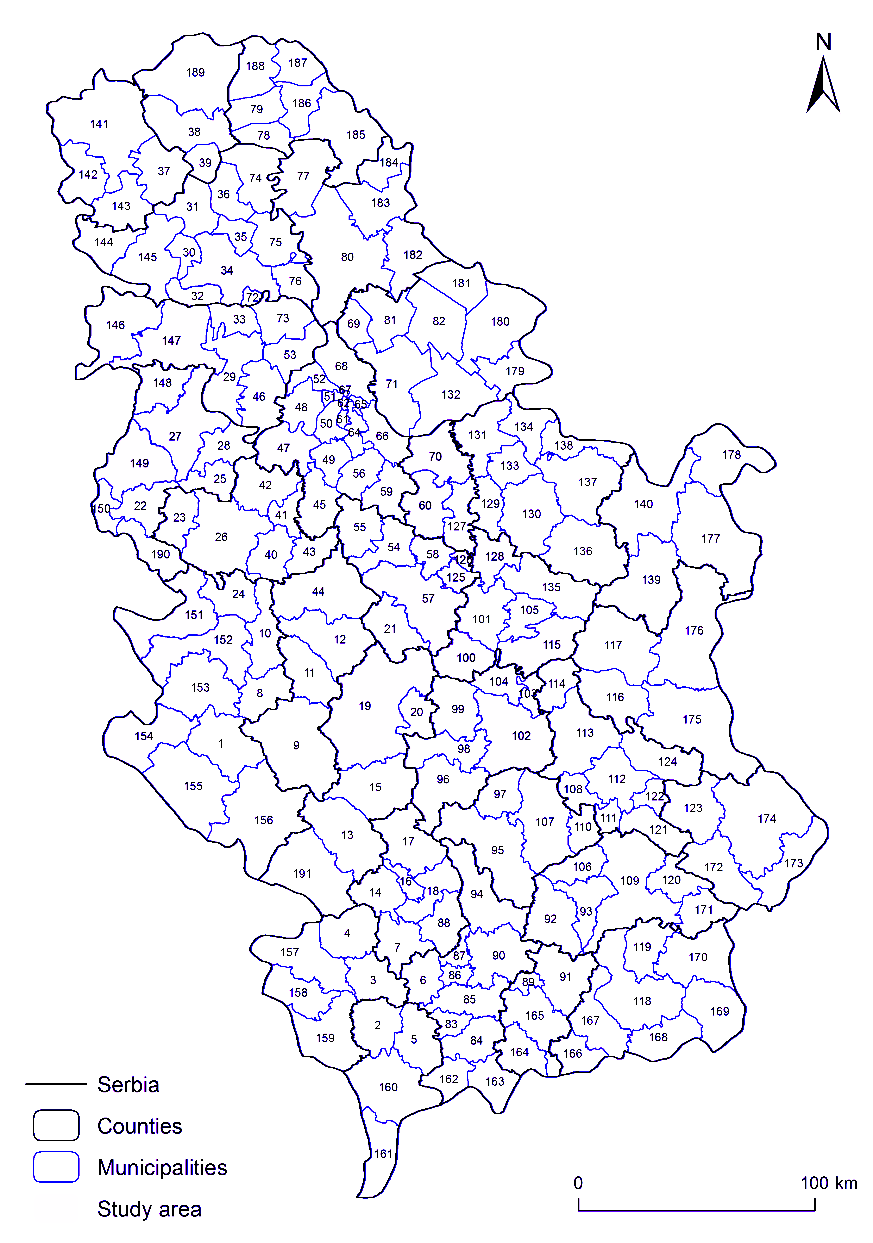
**

**Figure S1.** Study areas location (bold in text). Numbers refer to the ID of the municipality.

**Table S1.** The ID of the municipality and belonging county in Serbia.

| ID |  | Municipality | County | ID | Municipality | County |
| --- | --- | --- | --- | --- | --- | --- |
| 1 |  | Nova Varoš | Zlatibor | 96 | Brus | Rasina |
| 2 |  | Orahovac | Prizren | 97 | Blace | Toplica |
| 3 |  | Klina | Peč | 98 | Aleksandrovac | Rasina |
| 4 |  | Istok | Peč | 99 | Trstenik | Rasina |
| 5 |  | Suva Reka | Prizren | 100 | Rekovac | Pomoravlje |
| 6 |  | Glogovac | Kosovo | 101 | Jagodina | Pomoravlje |
| 7 |  | Srbica | Kosovo-Mitrovica | 102 | Kruševac | Rasina |
| 8 |  | Arilje | Zlatibor | 103 | Ćicevac | Rasina |
| 9 |  | Ivanjica | Moravica | 104 | Varvarin | Rasina |
| 10 |  | Požega | Zlatibor | 105 | Ćuprija | Pomoravlje |
| 11 |  | Lučani | Moravica | 106 | Bojnik | Jablanica |
| 12 |  | Čacak | Moravica | 107 | Prokuplje | Toplica |
| 13 |  | Novi Pazar | Raška | 108 | Merošina | Nivaša |
| 14 |  | Zubin Potok | Kosovo-Mitrovica | 109 | Leskovac | Jablanica |
| 15 |  | Raška | Raška | 110 | Žitoradja | Toplica |
| 16 |  | Zvečan | Kosovo-Mitrovica | 111 | Doljevac | Nivaša |
| 17 |  | Leposavić | Kosovo-Mitrovica | 112 | Niš | Nivaša |
| 18 |  | Kosovska Mitrovica | Kosovo-Mitrovica | **113** | **Aleksinac** | Nivaša |
| 19 |  | Kraljevo | Raška | 114 | Ražanj | Nivaša |
| 20 |  | Vrnjačka Banja | Raška | 115 | Paraćin | Pomoravlje |
| 21 |  | Knić | Šumadija | 116 | Sokobanja | Zalečar |
| 22 |  | Krupanj | Mačva | 117 | Boljevac | Zalečar |
| 23 |  | Osecina | Kolumbara | 118 | Vranje | Pčinja |
| 24 |  | Kosjerić | Zlatibor | 119 | Vladičin Han | Pčinja |
| 25 |  | Koceljeva | Mačva | 120 | Vlasotince | Jablanica |
| 26 |  | Valjevo | Kolumbara | 121 | Gadzin Han | Nivaša |
| 27 |  | Šabac | Mačva | 122 | Niška Banja | Nivaša |
| 28 |  | Vladimirci | Mačva | 123 | Bela Palanka | Pirot |
| 29 |  | Ruma | Srem | 124 | Svrljig | Nivaša |
| 30 |  | Bački Petrovac | South Bačka | 125 | Batočina | Šumadija |
| 31 |  | Vrbas | South Bačka | 126 | Lapovo | Šumadija |
| 32 |  | Beočin | South Bačka | 127 | Velika Plana | Podunavlje |
| 33 |  | Irig | Srem | 128 | Svilajnac | Pomoravlje |
| 34 |  | Novi Sad | South Bačka | 129 | Žabari | Braničevo |
| 35 |  | Temerin | South Bačka | 130 | Petrovac | Braničevo |
| 36 |  | Srbobran | South Bačka | 131 | Pozarevac | Braničevo |
| 37 |  | Kula | West Bačka | 132 | Kovin | South Banat |
| 38 |  | Bačka Topola | North Bačka | 133 | Malo Crnice | Braničevo |
| 39 |  | Mali I­đoš | North Bačka | 134 | Veliko Gradiste | Braničevo |
| 40 |  | Mionica | Kolumbara | 135 | Despotovac | Pomoravlje |
| 41 |  | Lajkovac | Kolumbara | 136 | Zagubica | Braničevo |
| 42 |  | Ub | Kolumbara | 137 | Kučevo | Braničevo |
| 43 |  | Ljig | Kolumbara | 138 | Golubac | Braničevo |
| 44 |  | Gornji Milanovac | Moravica | 139 | Bor | Bor |
| 45 |  | Lazarevac | City of Belgrade | 140 | Majdanpek | Bor |
| 46 |  | Pecinci | Srem | 141 | Sombor | West Bačka |
| 47 |  | Obrenovac | City of Belgrade | 142 | Apatin | West Bačka |
| 48 |  | Surčin | City of Belgrade | 143 | Odzaci | West Bačka |
| 49 |  | Barajevo | City of Belgrade | 144 | Bač | South Bačka |
| 50 |  | Čukarica | City of Belgrade | 145 | Bačka Palanka | South Bačka |
| 51 |  | Novi Beograd | City of Belgrade | 146 | Šid | Srem |
| 52 |  | Zemun | City of Belgrade | 147 | Sremska Mitrovica | Srem |
| 53 |  | Stara Pazova | Srem | 148 | Bogatic | Mačva |
| 54 |  | Topola | Šumadija | 149 | Loznica | Mačva |
| 55 |  | Arandjelovac | Šumadija | 150 | Mali Zvornik | Mačva |
| 56 |  | Sopot | City of Belgrade | 151 | Bajina Bašta | Zlatibor |
| 57 |  | Kragujevac | Šumadija | 152 | Užice | Zlatibor |
| 58 |  | Raca | Šumadija | 153 | Čajetina | Zlatibor |
| 59 |  | Mladenovac | City of Belgrade | 154 | Priboj | Zlatibor |
| 60 |  | Smederevska Palanka | Podunavlje | 155 | Prijepolje | Zlatibor |
| 61 |  | Rakovica | City of Belgrade | 156 | Sjenica | Zlatibor |
| 62 |  | Savski Venac | City of Belgrade | 157 | Peć | Peč |
| 63 |  | Vračar | City of Belgrade | 158 | Dečani | Peč |
| 64 |  | Voždovac | City of Belgrade | 159 | Djakovica | Peč |
| 65 |  | Zvezdara | City of Belgrade | 160 | Prizren | Prizren |
| 66 |  | Grocka | City of Belgrade | 161 | Gora | Prizren |
| 67 |  | Stari Grad | City of Belgrade | 162 | Strpce | Kosovo |
| 68 |  | Palilula | City of Belgrade | 163 | Kačanik | Kosovo |
| 69 |  | Opovo | South Banat | 164 | Vitina | Kosovo-Pomoravlje |
| 70 |  | Smederevo | Podunavlje | 165 | Gnjilane | Kosovo-Pomoravlje |
| 71 |  | Pančevo | South Banat | 166 | Preševo | Pčinja |
| 72 |  | Sremski Karlovci | South Bačka | 167 | Bujanovac | Pčinja |
| 73 |  | Indjija | Srem | 168 | Trgovšte | Pčinja |
| 74 |  | Bečej | South Bačka | 169 | Bosilegrad | Pčinja |
| 75 |  | Abalj | South Bačka | 170 | Surdulica | Pčinja |
| 76 |  | Titel | South Bačka | 171 | Crna Trava | Jablanica |
| 77 |  | Novi Bečej | Central Banat | 172 | Babušnica | Pirot |
| 78 |  | Ada | North Banat | 173 | Dimitorvgrad | Pirot |
| 79 |  | Senta | North Banat | 174 | Pirot | Pirot |
| 80 |  | Zrenjanin | Central Banat | 175 | Knjaževac | Zaječar |
| 81 |  | Kovačica | South Banat | 176 | Zaječar | Zaječar |
| 82 |  | Alibunar | South Banat | 177 | Negotin | Bor |
| 83 |  | Stimlje | Kosovo | 178 | Kladovo | Bor |
| 84 |  | Urosevac | Kosovo | 179 | Bela Crkva | South Banat |
| 85 |  | Lipljan | Kosovo | 180 | Vršac | South Banat |
| 86 |  | Kosovo Polje | Kosovo | 181 | Plandište | South Banat |
| 87 |  | Obilić | Kosovo | 182 | Sečanj | Central Banat |
| 88 |  | Vučitrn | Kosovo-Mitrovica | 183 | ÄitiÜte | Central Banat |
| 89 |  | Novo Brdo | Kosovo-Pomoravlje | 184 | Nova Crnja | Central Banat |
| 90 |  | Pristina | Kosovo | 185 | Kikinda | North Banat |
| 91 |  | Kosovska Kamenica | Kosovo-Pomoravlje | 186 | Čoka | North Banat |
| 92 |  | Medveđa | Jablanica | 187 | Novi Kneževac | North Banat |
| 93 |  | Lebane | Jablanica | 188 | Kanjiža | North Banat |
| 94 |  | Podujevo | Kosovo | 189 | Subotica | North Bačka |
| 95 |  | Kuršumlija | Toplica | 190 | Ljubovija | Mačva |
|  |  |  |  | 191 | Tutin | Raška |
